# Supplementary material
Source: Springer Nature journal article supplement (https://www.springermedizin.de/resource/supplementary/12885_2010_2631_MOESM9_ESM.pdf/9461592)

Relative cell no.  $\mu$

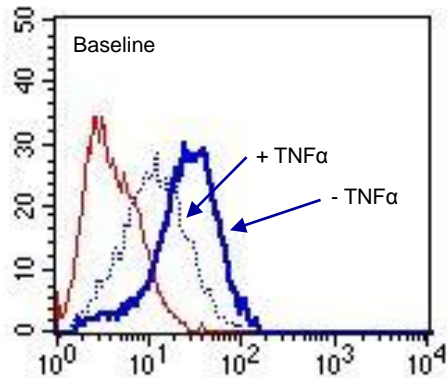

**b1.**

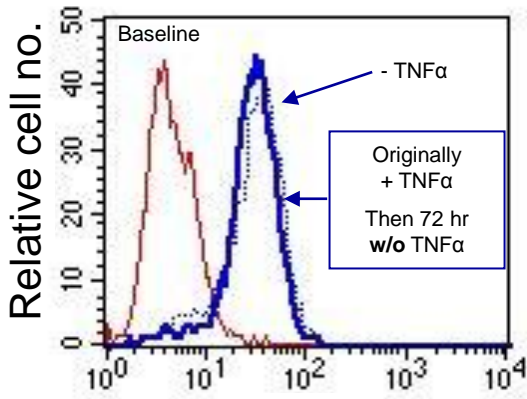

**b2.**

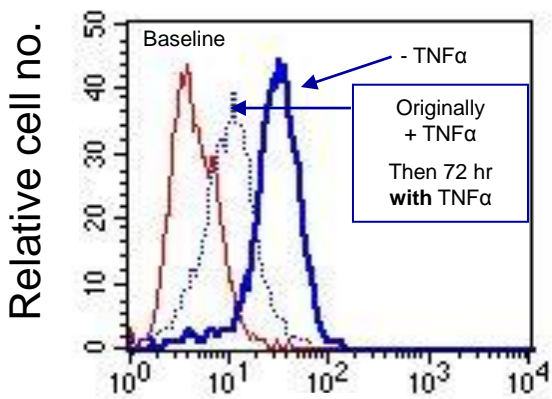

Fluorescence

Supplement: MOESM9 [file 9461592]
